# Antigen-experienced CXCR5<sup>-</sup> CD19<sup>low</sup> B cells are plasmablast precursors expanded in SLE

Franziska Szelinski<sup>1,2</sup>, Ana Luisa Stefanski<sup>1</sup>, Annika Wiedemann<sup>1</sup>, Eva Schrezenmeier<sup>1,3,4</sup>, Hector Rincon-Arevalo<sup>1,2,3,6</sup>, Karin Reiter<sup>1,2</sup>, Marie Lettau<sup>1,2,†</sup>, Van Duc Dang<sup>1,2</sup>, Sebastian Fuchs<sup>5</sup>, Andreas P. Frei<sup>5</sup>, Tobias Alexander<sup>1,2</sup>, Andreia C. Lino<sup>1,2,\*</sup> and Thomas Dörner<sup>1,2,\*</sup>

<sup>1</sup>Department of Rheumatology and Clinical Immunology, Charité–Universitätsmedizin Berlin, corporate member of Freie Universität Berlin, Humboldt-Universität zu Berlin, and the Berlin Institute of Health (BIH), Berlin, Germany

<sup>2</sup>German Rheumatism Research Center Berlin (DRFZ), a Leibniz Institute, Berlin, Germany

<sup>3</sup>Department of Nephrology and Intensive Medical Care, Charité- University Medicine Berlin, Berlin, Germany.

<sup>4</sup>Berlin Institute of Health (BIH)

<sup>5</sup>Roche Pharma Research and Early Development, Immunology, Infectious Diseases and Ophthalmology (I2O) Discovery and Translational Area, Roche Innovation Center Basel, Basel, Switzerland.

<sup>6</sup>Grupo de Inmunología Celular e Inmunogenética, Facultad de Medicina, Instituto de Investigaciones Médicas, Universidad de Antioquia UdeA, Medellín, Colombia.

\* ACL and TD contributed equally

## Corresponding Author:

Thomas Dörner, MD

Deutsches Rheumaforschungszentrum (DRFZ) Berlin and Department of Medicine/Rheumatology and Clinical Immunology Charite Universitätsmedizin Berlin, Germany.

Chariteplatz 1, 10117 Berlin, Germany

Email: [thomas.doerner@charite.de](mailto:thomas.doerner@charite.de)

†Present address: Marie Lettau, Institute of Functional Anatomy, Charité Universitätsmedizin Berlin, Germany

**Keywords:** DN B cells, systemic lupus erythematosus, CXCR5, atypical B cells, BCR, BNT162b2

## 1 Abstract

2 B cells play a critical role in the pathogenesis of systemic lupus erythematosus  
3 (SLE). We analysed two independent cohorts of healthy donors and SLE patients  
4 using a combined approach of flow and mass cytometry. We have found that IgD<sup>-</sup>  
5 CD27<sup>+</sup> switched and atypical IgD<sup>-</sup>CD27<sup>-</sup> memory B cells, which are increased in SLE,  
6 represent heterogeneous populations composed each of three different subsets,  
7 such as CXCR5<sup>+</sup>CD19<sup>int</sup>, CXCR5<sup>-</sup>CD19<sup>high</sup> and CXCR5<sup>-</sup>CD19<sup>low</sup>. Here, we  
8 characterize a hitherto unknown antigen-experienced CXCR5<sup>-</sup>CD19<sup>low</sup> B cell subsets  
9 enhanced in SLE and carrying a plasmablast (PB) phenotype enriched for switched  
10 immunoglobulins, and expressing CD38, CD95, CD71, *PRDM1*, *XBP-1*, and *IRF4*.  
11 CXCR5<sup>-</sup>CD19<sup>low</sup> resemble activated B cells with a characteristically diminished B cell  
12 receptor responsiveness. CXCR5<sup>-</sup>CD19<sup>low</sup> B cells increased with PB frequencies in  
13 SLE and upon BNT162b2 vaccination suggesting their interrelationship. Our data  
14 suggest that CXCR5<sup>-</sup>CD19<sup>low</sup> B cells are precursors of plasmablasts, thus co-  
15 targeting this subset may have therapeutic value in SLE.

## 16 Introduction

17 Various abnormalities of the B cell lineage have been identified in systemic lupus  
18 erythematosus (SLE), a chronic autoimmune disease characterized by autoantibody  
19 production and pathogenic autoimmune complex formation. Abnormalities include  
20 increased peripheral plasmablasts (PB)<sup>1</sup>, including expanded IgG and IgA producers<sup>2</sup>  
21 as well as altered composition of the B cell compartment with increased frequencies  
22 of IgD<sup>-</sup>CD27<sup>+</sup>switched and atypical IgD<sup>-</sup>CD27<sup>-</sup> memory B cells. How these  
23 observations are related remains unclear. Increased switched memory or IgD<sup>-</sup>CD27<sup>-</sup> B  
24 cells were found in rheumatic diseases such as SLE<sup>3</sup> and RA<sup>4, 5, 6</sup> as well as in  
25 peripheral blood or tissue in various inflammatory diseases, such as chronic  
26 inflammatory bowel<sup>7</sup> or Alzheimer's disease<sup>8</sup>.

27 In SLE, expansion of switched memory and IgD<sup>-</sup>CD27<sup>-</sup>, (also called double negative,  
28 DN) B cells, are features of patients with chronic inflammatory diseases. This shift in  
29 the B cell distribution is not seen in new onset patients even though their B cell  
30 distribution also differs from healthy donors (HD)<sup>9</sup>. These observations emphasize  
31 that enlargement of switched memory and DN B cells are an important characteristic  
32 of chronic inflammation<sup>9</sup>. In lupus nephritis (LN), a severe complication of SLE, DN B  
33 cells correlated with 24-h urine protein excretion and inversely with glomerular  
34 filtration rate<sup>10</sup>. Interestingly, this population was found diminished in LN patients  
35 during remission suggesting their potential pathogenic involvement and raising the  
36 possibility that DN B cells can serve as a prognostic biomarker in lupus nephritis<sup>10</sup>.

37 More recently, it became evident that DN B cells represent a heterogeneous subset,  
38 including age-/autoimmune-associated B cells (ABCs)<sup>11, 12, 13</sup>, Syk<sup>++</sup> B cells<sup>14</sup> and  
39 double negative 2 (DN2: IgD<sup>-</sup>CD27<sup>-</sup>CXCR5<sup>-</sup>CD11c<sup>+</sup>) populations<sup>15</sup>. All these subsets  
40 share partially overlapping characteristics and are linked to disease activity and  
41 autoantibody formation. Besides these alterations of B cell subsets residing among  
42 DN B cells, impaired chemokine receptor expression<sup>16</sup> and reduced responsiveness  
43 upon BCR stimulation<sup>17, 18, 19</sup> have been reported for these B cells in patients with  
44 SLE suggesting their distinct involvement in chronic autoimmunity.

45 This study further delineates the heterogeneity of switched memory (mem) and DN  
46 memory B cells in healthy donors and SLE patients. Using a combined flow and  
47 mass cytometry approach, we identified an enhanced CXCR5<sup>-</sup>CD19<sup>low</sup> B cell subset  
48 in the switched memory and DN compartments (mem<sup>low</sup> and DN<sup>low</sup>) in SLE carrying

49 distinct functional characteristics of antigen-experienced B cells distinct from  
50 previously known CXCR5<sup>+</sup>CD19<sup>int</sup> (mem<sup>int</sup> and DN<sup>int</sup>) and CXCR5<sup>-</sup>CD19<sup>high</sup> (mem<sup>high</sup>  
51 and DN<sup>high</sup>) B cells which showed a close relationship with peripheral PB. Our data  
52 provide multiple new insights, including B cell differentiation abnormalities in SLE  
53 relevant for therapeutic considerations targeting B cells in SLE.

## 54 Material and methods

55 **Patients.** Peripheral blood was obtained from 79 SLE patients meeting the SLICC  
56 criteria and from 70 healthy individuals. All study participants gave written consent to  
57 participate in this cross-sectional study which was approved by the ethics' committee  
58 of the Charité Berlin.

59 **Antibodies.** See Supplementary table 2 for antibodies used for flow cytometry  
60 analysis and Supplementary table 3 for antibodies used for mass cytometry analysis.

61 **Whole blood stainings.** Erytholysis of EDTA anticoagulated blood was performed  
62 according to manufacturer's protocol using Pharm Lyse (BD). FcR blocking reagent  
63 (Miltenyi Biotec) was added to cell suspension before cells were stained for CD3,  
64 CD14, CD20, CD19, CD27, IgD, CD38, CD95 and CXCR5. Frequencies of cells were  
65 determined using a BD Canto II cytometer.

66 **Peripheral blood mononuclear cells (PBMCs) isolation and cryopreservation.**  
67 PBMCs were isolated from EDTA anticoagulated whole blood for flow cytometry  
68 stainings and stimulation experiments. Li-Hep-anticoagulated blood was used for  
69 CyTOF analysis. Therefore, whole blood was diluted in PBS (Biochrom), layered over  
70 Ficoll-Paque PLUS (GE Healthcare Bio-Sciences) and centrifuged. PBMCs were  
71 harvested and washed twice with PBS before cell counting. PBMCs were processed  
72 immediately or cryopreserved for CyTOF analysis. For this, up to 10x10<sup>6</sup> PBMCs  
73 were diluted in 1:10 DMSO in FBS and cooled down to -80°C using CoolCell Cell  
74 Freezing Container (Biocision) before storing at -80°C until further analysis.

75 **Viability assay for discrimination of live and dead cells.** PBMCs were labelled  
76 with Blue fluorescent reactive dye (Molecular Probes Invitrogen) 1:1000 in PBS  
77 according to the manufacturer's recommendation and washed with PBE. Live/dead  
78 stained PBMCs were directly suspended in cold MACS rinsing buffer (with BSA;  
79 Miltenyi Biotec) for phenotyping or in pre-warmed RPMI 1640 (with GlutaMAX, Life  
80 Technologies) for BCR stimulation assays.



81 **Backbone surface staining of PBMCs for subset identification and**  
82 **phenotyping.** Viability labelled cells were pre-treated with FcR blocking reagent  
83 (Miltenyi Biotec) for 5 min before being stained with anti-CD19, CD27, CD38, IgD,  
84 CD14, CD13, CD10, CD24, CD11c and CD95 as backbone staining and for  
85 phenotyping in addition with anti-CD71, -PD1 and -PD-L1. Median fluorescence  
86 intensities (MFIs) or frequencies of positive cells were determined using BD LSR  
87 Fortessa x-20 (Beckton Dickinson).

88 **Heat map of foldchange.** To evaluate expression of surface marker of subsets in  
89 comparison to expression levels on the main B cell populations,  $\log_2$ (fold changes) of  
90 median FI or frequencies from the flow cytometry data were plotted as heat map.

91 **Staining for immunoglobulin isotypes.** Viability labelled cells were stained with  
92 anti-CD19, CD20, CD27, CD38, CD14, CD13, CD95, CXCR5, IgD, IgM, IgG and IgA.  
93 Data was obtained using BD LSR Fortessa x-20 (Beckton Dickinson). Frequencies of  
94 cells positive for the different isotypes were collected.

95 **High-dimensional single-cell proteomics analysis using CyTOF.** Frozen PBMCs  
96 were thawed and resuspended at 37°C in 1:10 FCS in IMDM. Further sample  
97 processing was done as previously described<sup>20</sup>. Samples were measured using a  
98 Helios mass cytometry instrument (Fluidigm).

99 **Vaccination of healthy individuals with BNT162b2.** B cell subsets of healthy  
100 individuals were analyzed before administration, 7, 14, 21 days after first vaccination  
101 and 7 days after boost with BNT162b2 (Comirnaty®).

102 **Data analysis and UMAP plotting.** Flow and mass cytometry data were analyzed  
103 using FlowJo (version 10.6.1, TreeStar). Flow cytometry data was pre-gated on IgD<sup>-</sup>  
104 B cells, down sampled to 59.000 events each per cohort of HD or SLE, respectively  
105 and clustered by CXCR5, CD19, CD38, CD27, CD10, CD71, CD95 and IgD using  
106 dimension reduction algorithm UMAP<sup>21</sup> plugin in FlowJo. Mass cytometry data was  
107 pre-gated on IgD<sup>-</sup> B cells excluding plasmablasts, down sampled to 8841 cells and  
108 clustered by CXCR5, CD19, CD38, CD27, CD11c and IgM using UMAP plugin. As  
109 settings for both UMAPs we selected the Euclidean distance function, nearest  
110 neighbour value of 15 and a minimum distance of 0.5.

111 **BCR stimulation for analysis of intracellular phosphorylation.** Cells ( $3 \times 10^6$ )  
112 stained for viability, blocked and stained with modified backbone surface staining

113 (excluding CD24, CXCR5 but including CD22) and equilibrated for 1h at 37°C in  
114 RPMI before stimulation with IgG/IgA/IgM (H+L) F(ab')<sub>2</sub> (15 µg/ml) for 5, 8 or 15 min.  
115 For baseline, control cells were incubated for 5 min with RPMI. Adding pre-warmed  
116 Lyse/Fix buffer (BD) at the respective time-points stopped the stimulation. After  
117 washing Phosflow Perm II Buffer (BD) was added to permeabilize cells overnight at -  
118 20°C. Cells were then stained for CD24, CXCR5 and the intracellular targets Syk and  
119 pSyk (Y352). To investigate BCR response and phosphorylation kinetics, median FIs  
120 of Syk, pSyk (Y352) and CD22 were determined.

121 **Gene expression analysis of B cell subsets.** Isolated PBMCs were enriched for B  
122 cells by depleting CD3, CD14 and CD235a via MACS microbeads (Miltenyi Biotec)  
123 according to the manufacturer's instruction. Cells were stained with CD19, CD20,  
124 CD27, CD38, CD3, CD14, CXCR5 and IgD for sorting. Naïve, pre-switched, total  
125 memory and PBs as well as DN<sup>int</sup>, DN<sup>low</sup> and DN<sup>high</sup> subsets were sorted and purity  
126 check was performed using Sony Sorter MA900. Cells were counted using  
127 MACSquant (Miltenyi Biotec). Cell suspension were spin down, resuspended in HTG  
128 lysis buffer at a concentration of 200 cells/µl and stored at -80 °C until further  
129 processing by HTG (Tucson, AZ). Samples with less than 28% of counts allocated to  
130 positive controls probes, read depth above 750,000 and expression variability above  
131 0,094 were analyzed.

132 **Statistical evaluation** Data analysis was performed using GraphPad Prism®  
133 (Version 9). Statistical significance was considered for p values less than 0.05 and  
134 depicted as follows: \* $p \leq 0.05$ , \*\* $p \leq 0.01$ , \*\*\* $p \leq 0.001$ , \*\*\*\* $p \leq 0.0001$ . Statistical  
135 significance between HD and SLE was determined using two-tailed Mann-Whitney-U  
136 (MWU) test. To determine statistical significance between the three populations  
137 Kruskal-Wallis-Test (KWT) followed by the Dunn's multiple comparison test was  
138 performed. Unless stated otherwise, scatter and bar plots represent means  $\pm$  SD and  
139 Box-Whisker plots show median and range.

140

## 141 Results

### 142 *CD19<sup>low</sup> memory and double negative B cells are increased in SLE patients*

143 We and others have reported several abnormalities within the B cell compartment in  
144 SLE patients suggesting their pathogenic relevance. In this regard, IgD<sup>-</sup>CD27<sup>-</sup> double  
145 negative (DN) B cells especially those co-expressing CD95<sup>22</sup> and IgD<sup>-</sup>CD27<sup>+</sup>  
146 switched memory B cells are increased in SLE<sup>1, 3</sup>. Therefore, we analyzed these B  
147 cell subsets in further detail (Supplementary Fig. S1) and found that switched  
148 memory B cells and DN B cells show a similar pattern regarding expression of  
149 CXCR5 and CD19, thus, independent of their CD27 expression. Notably, the  
150 expression of these molecules subdivided both compartments into three populations  
151 (Fig. 1A, Supplementary Fig. S1A). CXCR5<sup>+</sup>CD19<sup>int</sup> (mem/DN<sup>int</sup>) and CXCR5<sup>-</sup>  
152 CD19<sup>high</sup> (mem/DN<sup>high</sup>) B cells have been previously identified and described in HD  
153 and SLE with increased frequencies of the CXCR5<sup>-</sup>CD19<sup>high</sup> fraction in SLE<sup>15</sup>. Here,  
154 we identified a novel B cell subset within both switched memory B cells and DN B  
155 cells that is CXCR5<sup>-</sup>CD19<sup>low</sup> (mem/DN<sup>low</sup>).

156 We found that DN<sup>low</sup> B cells are significantly increased among CD19<sup>+</sup> B cells in SLE  
157 compared to HD (Fig. 1A). While only mem<sup>high</sup> B cells were increased in the switched  
158 memory compartment, all of the three subsets within the DN fraction were  
159 significantly increased in SLE patients (Fig. 1B). DN B cells were enriched for  
160 CXCR5 negative CD19<sup>low</sup> and CD19<sup>high</sup> B cell subsets compared to the CD27<sup>+</sup> (mem)  
161 compartment and in general remarkably expanded in SLE (Fig. 1 C). Next, we  
162 applied the dimension reduction algorithm UMAP<sup>21</sup> to cluster IgD<sup>-</sup> B cells. Using this  
163 approach, we identified mem/DN CD19<sup>int</sup>, mem/DN<sup>high</sup> and mem/DN<sup>low</sup> as distinct  
164 populations (Fig. 1D). In this UMAP, both CD19<sup>low</sup> populations clustered together with  
165 CD27<sup>++</sup>CD38<sup>++</sup> PB (Fig. 1D). Comparison of the clusters obtained from HD with SLE  
166 patients revealed an increased density of the corresponding subsets in SLE (Fig.  
167 1E), consistent with their significant expansion in this condition.

### 168 *CD19<sup>low</sup> B cell subsets display a plasmablast-like phenotype*

169 Next, we characterized DN<sup>int</sup>, DN<sup>high</sup> and DN<sup>low</sup> B cell subsets for the expression of  
170 several surface molecules including lineage, differentiation and activation markers.  
171 The resulting expression patterns of CD27, CD19, CXCR5, CD24, CD71, CD95,  
172 CD38 and CD11c is visualized by colour code in the dimension reduced UMAP (Fig.  
173 2A). With this analysis, we found that the subsets defined by their distinct CD19 and

174 CXCR5 expression allowed further differentiation by different expression profiles of  
175 CD24, CD71, CD95, CD38 and CD11c among the IgD<sup>-</sup>CD27<sup>-</sup> subsets (Fig. 2A).

176 We found that CD24, a marker with a dynamic expression pattern throughout B cell  
177 maturation and absent in antibody producing cells<sup>23</sup>, was not present in both subsets  
178 with low CD19 and lacking CXCR5 expression (mem/DN<sup>low</sup>) in contrast to the DN<sup>int</sup>  
179 population.

180 Besides CD19 expression the main discriminators between the DN<sup>low</sup> and DN<sup>high</sup>  
181 populations were CD38 and CD11c (Fig. 2A, B). As previously described, DN<sup>high</sup> are  
182 CD11c<sup>high</sup> but lack CD38 expression<sup>15, 20</sup>. In contrast, the majority of DN<sup>low</sup> B cells  
183 express CD38 (Fig. 2B, C and Supplementary Fig. 1B). Expression of CD71, a  
184 marker for early B cell activation<sup>24</sup>, was upregulated on the surface of CXCR5<sup>-</sup>  
185 CD19<sup>low</sup> B cells, comparable to levels found on plasmablasts (Fig. 2C). CD95 was  
186 expressed by the majority of DN<sup>low</sup> and DN<sup>high</sup> cells but not on DN<sup>int</sup>.

187 Subsequently, we evaluated the expression of inhibitory receptor PD-1 that is  
188 upregulated on B cells upon activation<sup>19, 25</sup> and its ligand PD-L1. Surface expression  
189 of PD-L1 and PD-1 was only found enhanced in DN<sup>high</sup> (Fig. 2D, Supplementary Fig.  
190 1C).

191 Most noteworthy, each of the subsets of DN differed from the corresponding subsets  
192 in the switched memory compartment mainly by the expression of CD27 while the  
193 other makers were expressed in a similar pattern (Fig. 2E, Supplementary Fig. 1).  
194 This, suggesting that memory and DN population consist of complementary subsets.

195 Comparison of the newly identified subsets with conventional transitional  
196 (CD10<sup>+</sup>CD24<sup>+</sup>CD38<sup>+</sup>), naïve (IgD<sup>+</sup>CD27<sup>-</sup>) or pre-switched memory (IgD<sup>+</sup>CD27<sup>+</sup>) B  
197 cells and PB (CD27<sup>++</sup>CD38<sup>++</sup>) demonstrated that mem/DN subsets are similar to PB,  
198 expressing comparable levels of CD19, CD24, CD10, CD11c, CD71, PD1, PD-L1  
199 and CD95. Main differences between PB and mem/DN<sup>low</sup> cells were a  
200 diminished/absent expression of CD27 and a slightly lower CD38 expression among  
201 both mem<sup>low</sup> and DN<sup>low</sup> B cell subsets (Fig. 2E). It needs emphasis that the  
202 frequencies of mem/DN<sup>low</sup> B cell strongly correlated with those of PB (Fig. 2F) in SLE  
203 patients as well as healthy controls further supporting their potential relationship.

204 Since we saw differences in the frequencies we also checked for qualitative  
205 differences between HD and SLE. When comparing expression profiles of the three

206 DN B cell subsets between HD and SLE patients, we found that expression levels of  
207 proliferation marker CD71 and frequencies of activation markers CD95<sup>+</sup> and CD38<sup>+</sup>  
208 cells were increased within the DN<sup>int</sup> (Fig. 2G) but not the mem<sup>int</sup> (Supplementary  
209 Fig.1D) population of SLE patients. The expression of CD71 was enhanced in both  
210 DN<sup>low</sup> and mem<sup>low</sup> in SLE (Fig. 2G, Supplementary Fig. 1D). Regarding Ig isotype  
211 expression, we found that mem/DN<sup>int</sup> and mem/DN<sup>high</sup> mainly express IgG while  
212 mem/DN<sup>low</sup> express IgG and IgA to a similar extend. (Fig. 2H).

### 213 **CD19<sup>low</sup> B cells are characterized by a distinct activation and differentiation** 214 **profile**

215 Next, we validated our findings in an independent cohort of 27 SLE patients and 18  
216 healthy donors using CyTOF including expression of activation markers and  
217 checkpoint molecules (Fig. 3, Supplementary Fig. 2). Initially, we confirmed the  
218 increased frequency of all three subsets within the DN compartment in SLE patients  
219 as shown by the UMAP plot by increased DN<sup>int</sup>, DN<sup>high</sup> and DN<sup>low</sup> clusters (Fig. 3A).  
220 Besides the significantly increased DN subsets in patients, mem<sup>low</sup> B cells were also  
221 substantially increased in SLE (Fig. 3B), corroborating the flow cytometry findings  
222 noted above.

223 Expression of early activation markers such as CD86, CD69 and CD25, both  
224 mem/DN<sup>low</sup> and mem/DN<sup>high</sup> were indicative of an activated phenotype with increased  
225 CD86 and in case of mem/DN<sup>high</sup> also increased CD69 expression compared to  
226 mem/DN<sup>int</sup>. In contrast, mem/DN<sup>high</sup> and mem/DN<sup>low</sup> populations expressed less  
227 CD25 compared to mem/DN<sup>int</sup> (Fig. 3C).

228 SLE patients expressed more CD86, CD69, and CD25 on the surface of mem<sup>high</sup> B  
229 cells and were characterized by elevated CD86 and CD25 expression on DN<sup>high</sup>  
230 compared to HD. In general, mem/DN<sup>int</sup> cells of patients with SLE expressed more  
231 CD86 and diminished CD25 surface expression (Fig. 3D) indicating their increased  
232 activation status.

233 Additionally, we determined CD45RA and CD45RO expression, known to be  
234 differentially expressed throughout B cell differentiation<sup>26, 27</sup>. CD45RA was increased  
235 on switched memory B cells compared to DN, but its expression was comparable  
236 among the three subsets analyzed (Supplementary Fig. 2 C). When comparing the  
237 expression in SLE, we found that CD45RA expression was reduced on DN<sup>high</sup> cells  
238 from patients in comparison with HD (Supplementary Fig. 2 D).

239 Co-stimulatory and co-inhibitory immune checkpoints (CPMs) regulate and modulate  
240 immune cells and play an important role in fine tuning the immune response<sup>20, 28, 29, 30,</sup>  
241 <sup>31</sup>. Therefore, we analyzed the expression profiles of various CPMs among the  
242 subsets of interest. Of particular note, mem/DN<sup>high</sup> upregulated immune checkpoint  
243 molecules, such as BTLA, VISTA and CTLA-4 (Fig. 3E, Supplementary Fig. 2 E, F)  
244 suggesting a shared functionality. While VISTA and CTLA-4 expression by  
245 mem/DN<sup>low</sup> cells was comparable to the levels found on the mem/DN<sup>int</sup>, BTLA was  
246 downregulated (Fig.3E).

247 SLE patients expressed higher levels of VISTA on mem<sup>low</sup> B cells (Fig. 3F) but  
248 otherwise did not differ from findings in HD. Overall, CD19<sup>low</sup> B cells showed a  
249 strikingly reduced expression of checkpoint molecules independent of their CD27  
250 expression.

#### 251 **CD19<sup>low</sup> subsets correlate with plasmablasts generated in HD upon vaccination** 252 **with BNT162b2**

253 Since mem<sup>low</sup> and DN<sup>low</sup> are increased in SLE and correlated with PB, we asked  
254 whether an acute immune response resulting in PB formation would be accompanied  
255 by alterations and expansion of those subsets in HD. Therefore, we monitored B cell  
256 subsets in HD on day 0, 7, 14 and 21 after single-dose administration of BNT162b2  
257 vaccine and 7 days after boost (Fig. 4A). Of particular note, this vaccine is able to  
258 elicit a striking T cell dependent immune activation<sup>32</sup>. As a result, the frequencies of B  
259 cell subsets did not change significantly except reduction of mem<sup>int</sup> and DN<sup>int</sup> on day  
260 21 after vaccination compared to day0 and day 7, respectively. Although not  
261 significant, a trend of increased plasmablast formation was detected at day 7 after  
262 boost (Fig. 4A). Of particular note, frequencies of mem<sup>low</sup> B cells correlated strikingly  
263 with PB on day 21 and 7 days after boost. DN<sup>low</sup> B cells also showed a correlation  
264 with PB 7 days after boost (Fig. 4B). These findings supported further that mem<sup>low</sup>  
265 and DN<sup>low</sup> expansion follows kinetics of PB induction and depends on T cell  
266 instruction as evidenced by BNT162b2 vaccination.

#### 267 **CD19<sup>low</sup> subsets present with reduced BCR responsiveness**

268 To evaluate B cell receptor responsiveness of newly identified subsets as a read-out  
269 for their functional competence, we studied phosphorylation kinetics of Syk (Y352)  
270 upon anti-BCR stimulation (Fig. 5A). We observed diminished Syk phosphorylation in  
271 the DN compartment compared to subsets of switched memory B cells. In both



272 switched memory and DN B cells, subsets with low CD19 expression showed lowest  
273 pSyk kinetics while CD19<sup>int</sup> and CD19<sup>high</sup> subsets respond similarly to BCR  
274 stimulation. The BCR responsiveness was significantly reduced among mem<sup>int</sup> and  
275 mem<sup>high</sup> from patients with SLE five to eight minutes after stimulation. While there  
276 was an overall lower phosphorylation in B cells from SLE patients, both mem/DN<sup>low</sup>  
277 subsets from SLE patients showed a BCR response kinetics as found for  
278 CD27<sup>++</sup>CD38<sup>++</sup> plasmablasts (Fig. 5A).

279 Subsequently, we evaluated whether differences in Syk protein levels in steady state  
280 may account for this difference between subsets and SLE vs HD (Fig. 5B). We found  
281 that basal Syk levels were highest in mem/DN<sup>high</sup>. SLE patients showed significantly  
282 decreased Syk levels in mem<sup>low</sup> B cells. Interestingly, Syk expression was  
283 comparable in mem/DN<sup>low</sup> subsets compared with mem/DN<sup>int</sup> cells (Fig. 5A,B).

#### 284 ***PRDM1, XBP1, IRF4 and EZH2* upregulation in CD19<sup>low</sup> B cells suggests a** 285 **plasmablast-like transcriptional program**

286 To further understand the distinct nature of the analyzed B cell subsets,  
287 transcriptome analysis was performed on naive, pre-switched, total memory (IgD<sup>-</sup>  
288 CD27<sup>+</sup>), DN<sup>int</sup>, DN<sup>high</sup>, DN<sup>low</sup> and PBs of patients with SLE and HD (Fig. 6).  
289 Transcripts of IRF4 a transcription factor crucial for differentiation<sup>33</sup> and survival<sup>34</sup> of  
290 plasmablast and plasma cell was not only upregulated in plasmablast but also  
291 increased in DN<sup>low</sup> cells. IRF4 is known to regulate Blimp-1 (encoded by *PRDM1*)  
292 expression a regulator of plasma cell differentiation<sup>35</sup>. The median transcription level  
293 of *PRDM1* was found increased in DN<sup>low</sup> cells. Consistently, mRNA levels of *Pax5*, a  
294 transcription factor downregulated by Blimp-1, was found intermediately decreased,  
295 while *XBP1* and *EZH2* showed a slightly higher expression level among DN<sup>low</sup> B  
296 cells. No changes occurred for *BCL2L1* expression as a marker for GC  
297 differentiation<sup>36</sup>. Thus, there was an overall trend of key transcription factors defining  
298 B cells and PB indicating that the DN<sup>low</sup> population carries the transcriptional program  
299 closely related to PB.

## 300 Discussion

301 Herein, we identified two novel CXCR5<sup>+</sup>CD19<sup>low</sup> populations, mem<sup>low</sup> and DN<sup>low</sup>,  
302 residing within conventional switched memory and IgD<sup>-</sup>CD27<sup>-</sup> atypical memory B  
303 cells, respectively. Additionally, we found a not yet described CXCR5<sup>+</sup>CD19<sup>high</sup>  
304 population in switched memory B cells (mem<sup>high</sup>) which shared characteristics, such

305 as CD11c<sup>+</sup> expression, with the previously reported DN2<sup>15</sup>. The DN2 population  
306 corresponds to the DN<sup>high</sup> population which is further characterized here and has  
307 been described as precursor of antibody secreting plasmablasts generated by  
308 extrafollicular activation, and found to be increased in autoimmune  
309 conditions such as SLE<sup>15</sup> but also acute viral infections such as SARS-CoV-2<sup>37</sup>. The  
310 expression profile of CD19<sup>high</sup>, CD38<sup>-</sup>, CD95<sup>+</sup> and Ki-67 together with the high BCR  
311 responsiveness and increased Syk expression also suggest that mem/DN<sup>high</sup>  
312 represent the previously described Syk<sup>high</sup> population<sup>14</sup>.

313 Although various groups reported an overall reduction of CD19 expression on B cells  
314 in SLE, a specific CD19<sup>low</sup> population has not been characterized so far. In the study  
315 by Culton *et al.*<sup>38</sup>, the SLE cohort was subdivided into CD19<sup>lo</sup> and CD19<sup>hi</sup> patients  
316 based on global CD19 expression and the presence or lack of a CD19<sup>hi</sup> B cell  
317 population. Autoantibodies were detected in both patient groups. The majority of the  
318 CD19<sup>low</sup> B cells were described as IgD<sup>+</sup>, CD38<sup>+</sup>, and CD27<sup>-</sup>. Additionally, a decrease  
319 in CD19 expression on B cells was reported in anti-neutrophil cytoplasmic  
320 autoantibody associated small vessel vasculitis (ANCA-SVV) patients, suggesting  
321 that downregulation of CD19 might be a common feature of antibody driven  
322 disease<sup>38</sup>. Other studies reported lower CD19 expression in CD27<sup>-</sup> but also in CD27<sup>+</sup>  
323 B cells<sup>39, 40</sup>. These studies did not discriminate populations based on their IgD  
324 expression. Overall decrease of CD19 expression was seen in both active<sup>39</sup> and  
325 quiescent<sup>40</sup> patients with SLE and also in patients with ANCA-SVV, suggesting  
326 variation in CD19 expression as an intrinsic abnormality linked to autoimmunity rather  
327 than driven by antigen specificity or disease severity.

328 We found that CD19<sup>low</sup> B cell subsets, mem<sup>low</sup> and DN<sup>low</sup> expressed co-stimulatory  
329 molecule and activation marker CD86, proliferation marker CD71<sup>41</sup> and the majority  
330 were CD38<sup>+</sup> and CD95<sup>+</sup> while early B cell stage marker CD24<sup>42</sup> and CD10<sup>43</sup> were  
331 absent. In combination with surface expression of class switched immunoglobulins  
332 IgG and IgA allows the conclusion that mem/DN<sup>low</sup> B cells were antigen experienced.  
333 Although, Syk itself was not reduced, phosphorylation kinetics of Syk upon anti-BCR  
334 stimulation were lower in DN<sup>low</sup>, similarly to PB. This could be caused either by an  
335 anergic post- activation phenotype similar to the one seen in general naïve and  
336 memory B cells of patients with autoimmune conditions like SLE, RA and pSS<sup>18</sup>. An  
337 alternative explanation would be the downregulation of the BCR including BCR-  
338 associated surface molecules like negative regulator BTLA which we found



339 downregulated in mem/DN<sup>low</sup> cells. Increased frequencies of the BTLA low  
340 expressing DN<sup>low</sup> population in SLE could explain the reduced BTLA expression as  
341 recently reported for the overall DN population in patients with SLE<sup>28</sup>.

342 Interestingly and in alignment with our findings, Ruschil *et al.*<sup>44</sup> recently found that  
343 transcripts from total DN cells did not cluster separately from the other cell  
344 populations but instead clustered donor dependent with naïve, memory or  
345 plasmablasts. They found the number of identified differentially expressed genes was  
346 low between plasmablasts and total DN B cells<sup>44</sup>. In this context, our study detected  
347 that mem/DN<sup>low</sup> populations clearly correlated with PBs in SLE and immune  
348 challenged HD upon vaccination with BNT162b2. In addition, targeted RNAseq  
349 analysis demonstrated an upregulated plasmablast-like transcriptional programming  
350 in DN<sup>low</sup>. Although further studies are needed to evaluate those findings for the  
351 mem<sup>low</sup> population, the current data support that mem/DN<sup>low</sup> cells are a unique  
352 subset carrying characteristics of PB destiny.

353 The fact that we found similar subsets in both the switched memory and DN B cell  
354 compartment was unexpected. While the double negative population is known for its  
355 heterogeneity and two of the three populations are part of the DN domain, we found  
356 shared characteristics with previously reported subsets<sup>14, 15</sup>. Of note, not so much is  
357 known about the diversity of the CD27<sup>+</sup> memory compartment beyond Ig isotype  
358 distribution.

359 The features of the three subsets were comparable between corresponding subset in  
360 IgD<sup>-</sup>CD27<sup>+</sup> switched and IgD<sup>-</sup>CD27<sup>-</sup> atypical memory B cells supporting the idea that  
361 the increase of DN B cells in chronic immune conditions can also be largely related to  
362 loss of CD27 expression<sup>45</sup> which is supported by their comparable increase in SLE  
363 and in particular by lack of CXCR5 expression. The latter can result from their a)  
364 post-GC b) extrafollicular or c) activation status also known to be related with CD27  
365 shedding including increased solubleCD27 in autoimmune diseases<sup>45, 46</sup>.

366 It is widely known that B cell homeostasis is altered in patients with SLE and B cell  
367 targeted interventions are promising in this disease. However, the heterogeneity of  
368 the switched memory and DN populations is only partially understood, and it remains  
369 unclear how it is induced and/or maintained or how it contributes to the course of the  
370 disease. Using CD19 and CXCR5 clearly allows the differentiation of switched  
371 memory and DN B cells not only into three distinct subsets each but also suggest

372 that mem/DN<sup>low</sup> are direct precursors of plasmablasts, while mem<sup>int</sup> and DN<sup>int</sup> appear  
373 to belong to the B memory compartment. With new compounds targeting B cells in  
374 the pharmaceutical pipeline, it is important to understand the mechanisms of how B  
375 cells subsets are driving the disease and require consideration by innovative  
376 therapies. Our data suggest that the CXCR5<sup>-</sup> populations might not be targeted by  
377 anti-CXCR5 and anti-CD19 strategies but might benefit from anti-CD38 and anti-  
378 BAFF therapies. For belimumab, which targets early, transitional B cells and partially  
379 PB/PC<sup>47, 48</sup>, recent studies could document that blocking BAFF/BLyS by belimumab  
380 had rapid effects on B cell subsets of earlier developmental stages such as naïve B  
381 cells. Late B cell stages, such as memory or plasma cells, decreased later in a  
382 gradual manner or did not change upon treatment. Only early immunological  
383 changes correlated with disease improvement<sup>49</sup> These data together with our study  
384 provide a rationale for modalities that target naïve and early B cell stages and may  
385 thereby prevent not only their differentiation into memory B cells but also their direct  
386 path becoming plasmablasts/plasma cells.

387 Collectively, the data presented here, including surface marker expression,  
388 correlation analysis, BCR kinetics and transcription analysis strongly indicate that  
389 mem/DN<sup>low</sup> cells are precursors of PB and directly contribute to plasmacytosis upon  
390 immune activation. These mem/DN<sup>low</sup> cells reflect a subset of pre-plasma cells that  
391 may not require to undergo full or incomplete memory B cell differentiation.  
392 Understanding of the involved selection mechanisms will be important not only in  
393 terms of their immunobiological features but also for potential treatment strategies. In  
394 this regard, the current data suggest that there could be selective treatment  
395 approaches not only for certain B cell subsets but also distinct PB/PC compartments,  
396 including the possibility to leave protective PB/PC untouched.

397

## 398 **Acknowledgment**

399 We thank S. Gaertner, D. Hurd and M. Rastegar from HTG Molecular Diagnostics,  
400 Inc. and J. Kirsch, T. Kaiser from the Flow Cytometry Core Facility of the DRFZ.

## 401 **Author Contributions**

402 The theoretical framework was developed by FS, ACL and TD.

403 Data were obtained by FS, ALS, ES, HR-A, AW, KR, ML, VDD, AF and SF.

404 Data were analyzed by FS, ACL.

405 All authors developed, read, and approved of the current manuscript.

## 406 **Conflict of Interest Statement**

407 The authors declare that the research was conducted in the absence of any  
408 commercial or financial relationships that could be construed as a potential conflict of  
409 interest.

## 410 **Funding**

411 This work was supported by DFG grants project Do491/7-5, Do491/10-1, Do491/11-  
412 1, TR130 project 24 and LI3540/1-1. The DRFZ, a Leibniz Institute was supported by  
413 the Senate of Berlin. ALS is supported by DGRh Research Initiative 2020. ES was  
414 supported by a Fellowship of the Berlin Institutes of Health and received a grant from  
415 the Federal Ministry of Education and Research (BMBF) (BCOVIT, 01KI20161). HR-  
416 A was supported by COLCIENCIAS scholarship No. 727, 2015.  
417 Prof. Dörner was granted the HTG EdgeSeq 2020 Autoimmune Panel Research  
418 Grant Award for transcriptome analysis using the Immune Response Panel.

## 419 **Ethics Statement**

420 This study was carried out in accordance with the recommendations of the ethics'  
421 committee at the Charité University Hospital Berlin with written informed consent  
422 from all subjects. All subjects gave written informed consent in accordance with the  
423 Declaration of Helsinki.

## 424 **Availability of data and material**

425 The datasets used and analyzed during the current study are available from the  
426 corresponding author on reasonable request.  
427

## 428 **References**

- 429 1. Odendahl, M. *et al.* Disturbed peripheral B lymphocyte homeostasis in  
430 systemic lupus erythematosus. *J Immunol* **165**, 5970-5979 (2000).
- 431 2. Mei, H.E. *et al.* Plasmablasts With a Mucosal Phenotype Contribute to  
432 Plasmacytosis in Systemic Lupus Erythematosus. *Arthritis Rheumatol* **69**,  
433 2018-2028 (2017).

435

- 436 3. Wei, C. *et al.* A new population of cells lacking expression of CD27 represents  
437 a notable component of the B cell memory compartment in systemic lupus  
438 erythematosus. *J Immunol* **178**, 6624-6633 (2007).
- 439  
440 4. Moura, R.A. *et al.* B-cell phenotype and IgD-CD27- memory B cells are  
441 affected by TNF-inhibitors and tocilizumab treatment in rheumatoid arthritis.  
442 *PLoS One* **12**, e0182927-e0182927 (2017).
- 443  
444 5. Souto-Carneiro, M.M. *et al.* Alterations in peripheral blood memory B cells in  
445 patients with active rheumatoid arthritis are dependent on the action of tumour  
446 necrosis factor. *Arthritis Res Ther* **11**, R84 (2009).
- 447  
448 6. Floudas, A. *et al.* Pathogenic, glycolytic PD-1+ B cells accumulate in the  
449 hypoxic RA joint. *JCI Insight* **5** (2020).
- 450  
451 7. Pararasa, C. *et al.* Reduced CD27(-)IgD(-) B Cells in Blood and Raised  
452 CD27(-)IgD(-) B Cells in Gut-Associated Lymphoid Tissue in Inflammatory  
453 Bowel Disease. *Front Immunol* **10**, 361 (2019).
- 454  
455 8. Bulati, M. *et al.* Double negative (IgG+IgD-CD27-) B cells are increased in a  
456 cohort of moderate-severe Alzheimer's disease patients and show a pro-  
457 inflammatory trafficking receptor phenotype. *J Alzheimers Dis* **44**, 1241-1251  
458 (2015).
- 459  
460 9. Zhu, L. *et al.* Altered frequencies of memory B cells in new-onset systemic  
461 lupus erythematosus patients. *Clinical Rheumatology* **37**, 205-212 (2018).
- 462  
463 10. You, X. *et al.* Double Negative B Cell Is Associated With Renal Impairment in  
464 Systemic Lupus Erythematosus and Acts as a Marker for Nephritis Remission.  
465 *Frontiers in Medicine* **7** (2020).
- 466  
467 11. Li, H., Borrego, F., Nagata, S. & Tolnay, M. Fc Receptor-like 5 Expression  
468 Distinguishes Two Distinct Subsets of Human Circulating Tissue-like Memory  
469 B Cells. *The Journal of Immunology* **196**, 4064-4074 (2016).
- 470  
471 12. Rubtsova, K., Rubtsov, A.V., Cancro, M.P. & Marrack, P. Age-Associated B  
472 Cells: A T-bet-Dependent Effector with Roles in Protective and Pathogenic  
473 Immunity. *The Journal of Immunology* **195**, 1933-1937 (2015).
- 474  
475 13. Cancro, M.P. Age-Associated B Cells. *Annu Rev Immunol* **38**, 315-340 (2020).
- 476  
477 14. Fleischer, S.J. *et al.* Increased Frequency of a Unique Spleen Tyrosine Kinase  
478 Bright Memory B Cell Population in Systemic Lupus Erythematosus. *Arthritis &*  
479 *Rheumatology* **66**, 3424-3435 (2014).

- 480  
481 15. Jenks, S.A. *et al.* Distinct Effector B Cells Induced by Unregulated Toll-like  
482 Receptor 7 Contribute to Pathogenic Responses in Systemic Lupus  
483 Erythematosus. *Immunity* **49**, 725-739.e726 (2018).
- 484  
485 16. Yoshikawa, M. *et al.* Type I and II interferons commit to abnormal expression  
486 of chemokine receptor on B cells in patients with systemic lupus  
487 erythematosus. *Clinical Immunology* **200**, 1-9 (2019).
- 488  
489 17. Fleischer, S.J., Daridon, C., Fleischer, V., Lipsky, P.E. & Dörner, T. Enhanced  
490 Tyrosine Phosphatase Activity Underlies Dysregulated B Cell Receptor  
491 Signaling and Promotes Survival of Human Lupus B Cells. *Arthritis Rheumatol*  
492 **68**, 1210-1221 (2016).
- 493  
494 18. Weißenberg, S.Y. *et al.* Identification and Characterization of Post-activated B  
495 Cells in Systemic Autoimmune Diseases. *Front Immunol* **10**, 2136 (2019).
- 496  
497 19. Stefanski, A.L. *et al.* Enhanced Programmed Death 1 and Diminished  
498 Programmed Death Ligand 1 Up-Regulation Capacity of Post-Activated Lupus  
499 B Cells. *Arthritis Rheumatol* **71**, 1539-1544 (2019).
- 500  
501 20. Rincon-Arevalo, H. *et al.* Deep Phenotyping of CD11c+ B Cells in Systemic  
502 Autoimmunity and Controls. *Frontiers in Immunology* **12** (2021).
- 503  
504 21. McInnes, L. & Healy, J. UMAP: Uniform Manifold Approximation and  
505 Projection for Dimension Reduction. (2018).
- 506  
507 22. Jacobi, A.M. *et al.* Activated memory B cell subsets correlate with disease  
508 activity in systemic lupus erythematosus: delineation by expression of CD27,  
509 IgD, and CD95. *Arthritis Rheum* **58**, 1762-1773 (2008).
- 510  
511 23. Hunte, B.E., Capone, M., Zlotnik, A., Rennick, D. & Moore, T.A. Acquisition of  
512 CD24 expression by Lin<sup>-</sup>CD43<sup>+</sup>B220<sup>low</sup> cells coincides with  
513 commitment to the B cell lineage. *European Journal of Immunology* **28**, 3850-  
514 3856 (1998).
- 515  
516 24. Ellebedy, A.H. *et al.* Defining antigen-specific plasmablast and memory B cell  
517 subsets in human blood after viral infection or vaccination. *Nat Immunol* **17**,  
518 1226-1234 (2016).
- 519  
520 25. Thibult, M.-L. *et al.* PD-1 is a novel regulator of human B-cell activation.  
521 *International Immunology* **25**, 129-137 (2012).
- 522

- 523 26. Jensen, G.S., Poppema, S., Mant, M.J. & Pilarski, L.M. Transition in CD45  
524 isoform expression during differentiation of normal and abnormal B cells.  
525 *International Immunology* **1**, 229-236 (1989).
- 526  
527 27. Jackson, S.M. *et al.* CD45RO enriches for activated, highly mutated human  
528 germinal center B cells. *Blood* **110**, 3917-3925 (2007).
- 529  
530 28. Wiedemann, A. *et al.* BTLA Expression and Function Are Impaired on SLE B  
531 Cells. *Frontiers in Immunology* **12** (2021).
- 532  
533 29. Ceeraz, S., Nowak, E.C., Burns, C.M. & Noelle, R.J. Immune checkpoint  
534 receptors in regulating immune reactivity in rheumatic disease. *Arthritis Res*  
535 *Ther* **16**, 469 (2014).
- 536  
537 30. Paluch, C., Santos, A.M., Anzilotti, C., Cornall, R.J. & Davis, S.J. Immune  
538 Checkpoints as Therapeutic Targets in Autoimmunity. *Frontiers in immunology*  
539 **9**, 2306-2306 (2018).
- 540  
541 31. Murphy, K.A. *et al.* Immunomodulatory receptors are differentially expressed  
542 in B and T cell subsets relevant to autoimmune disease. *Clin Immunol* **209**,  
543 108276 (2019).
- 544  
545 32. Sahin, U. *et al.* COVID-19 vaccine BNT162b1 elicits human antibody and TH1  
546 T cell responses. *Nature* **586**, 594-599 (2020).
- 547  
548 33. Sciammas, R. *et al.* Graded expression of interferon regulatory factor-4  
549 coordinates isotype switching with plasma cell differentiation. *Immunity* **25**,  
550 225-236 (2006).
- 551  
552 34. Tellier, J. *et al.* Blimp-1 controls plasma cell function through the regulation of  
553 immunoglobulin secretion and the unfolded protein response. *Nat Immunol* **17**,  
554 323-330 (2016).
- 555  
556 35. Low, M.S.Y. *et al.* IRF4 Activity Is Required in Established Plasma Cells to  
557 Regulate Gene Transcription and Mitochondrial Homeostasis. *Cell Rep* **29**,  
558 2634-2645.e2635 (2019).
- 559  
560 36. Takahashi, Y. *et al.* Relaxed negative selection in germinal centers and  
561 impaired affinity maturation in bcl-xL transgenic mice. *J Exp Med* **190**, 399-410  
562 (1999).
- 563  
564 37. Woodruff, M.C. *et al.* Extrafollicular B cell responses correlate with neutralizing  
565 antibodies and morbidity in COVID-19. *Nature Immunology* **21**, 1506-1516  
566 (2020).



- 567  
568 38. Culton, D.A. *et al.* Similar CD19 dysregulation in two autoantibody-associated  
569 autoimmune diseases suggests a shared mechanism of B-cell tolerance loss.  
570 *J Clin Immunol* **27**, 53-68 (2007).
- 571  
572 39. Sato, S., Hasegawa, M., Fujimoto, M., Tedder, T.F. & Takehara, K.  
573 Quantitative genetic variation in CD19 expression correlates with  
574 autoimmunity. *J Immunol* **165**, 6635-6643 (2000).
- 575  
576 40. Korganow, A.-S. *et al.* Peripheral B cell abnormalities in patients with systemic  
577 lupus erythematosus in quiescent phase: Decreased memory B cells and  
578 membrane CD19 expression. *Journal of Autoimmunity* **34**, 426-434 (2010).
- 579  
580 41. Biselli, R., Matricardi, P.M., D'Amelio, R. & Fattorossi, A. Multiparametric flow  
581 cytometric analysis of the kinetics of surface molecule expression after  
582 polyclonal activation of human peripheral blood T lymphocytes. *Scand J*  
583 *Immunol* **35**, 439-447 (1992).
- 584  
585 42. Mensah, F.F.K. *et al.* CD24 Expression and B Cell Maturation Shows a Novel  
586 Link With Energy Metabolism: Potential Implications for Patients With Myalgic  
587 Encephalomyelitis/Chronic Fatigue Syndrome. *Frontiers in Immunology* **9**  
588 (2018).
- 589  
590 43. Palanichamy, A. *et al.* Novel human transitional B cell populations revealed by  
591 B cell depletion therapy. *Journal of immunology (Baltimore, Md. : 1950)* **182**,  
592 5982-5993 (2009).
- 593  
594 44. Ruschil, C. *et al.* Specific Induction of Double Negative B Cells During  
595 Protective and Pathogenic Immune Responses. *Frontiers in Immunology* **11**  
596 (2020).
- 597  
598 45. Font, J. *et al.* Elevated soluble CD27 levels in serum of patients with systemic  
599 lupus erythematosus. *Clin Immunol Immunopathol* **81**, 239-243 (1996).
- 600  
601 46. Swaak, A.J., Hintzen, R.Q., Huysen, V., van den Brink, H.G. & Smeenk, J.T.  
602 Serum levels of soluble forms of T cell activation antigens CD27 and CD25 in  
603 systemic lupus erythematosus in relation with lymphocytes count and disease  
604 course. *Clin Rheumatol* **14**, 293-300 (1995).
- 605  
606 47. Benitez, A. *et al.* Belimumab alters transitional B-cell subset proportions in  
607 patients with stable systemic lupus erythematosus. *Lupus* **28**, 1337-1343  
608 (2019).
- 609

610 48. Jacobi, A.M. *et al.* Effect of long-term belimumab treatment on B cells in  
611 systemic lupus erythematosus: extension of a phase II, double-blind, placebo-  
612 controlled, dose-ranging study. *Arthritis and rheumatism* **62**, 201-210 (2010).

613

614 49. Ramsköld, D. *et al.* B cell alterations during BAFF inhibition with belimumab in  
615 SLE. *EBioMedicine* **40**, 517-527 (2019).

616

## 617 Figure legends

618 **Figure 1: CD19<sup>low</sup>CXCR5<sup>-</sup> B cells are increased in SLE patients. (A)**

619 Representative flow cytometry contour plots of one healthy donor and one SLE  
620 patient showing CD19 and CXCR5 expression in IgD<sup>-</sup>CD27<sup>+</sup> or IgD<sup>-</sup>CD27<sup>-</sup> B cells. **(B)**

621 Distribution of CD19<sup>+</sup> B cell frequencies of the six populations CXCR5<sup>+</sup>CD19<sup>int</sup>  
622 (mem<sup>int</sup>/DN<sup>int</sup>), CXCR5<sup>-</sup>CD19<sup>low</sup> (mem<sup>low</sup>/DN<sup>low</sup>), CXCR5<sup>-</sup>CD19<sup>high</sup> (mem<sup>high</sup>/DN<sup>high</sup>) of

623 IgD<sup>-</sup>CD27<sup>+</sup> memory or IgD<sup>-</sup>CD27<sup>-</sup> DN B cells respectively for HD (n=16, dots) and  
624 patients with SLE (n=28, triangles). **(C)** Distribution of subsets within switched

625 memory (IgD<sup>-</sup>CD27<sup>+</sup>) and DN (IgD<sup>-</sup>CD27<sup>-</sup>) in HD (n=16) and SLE (n=28) **(D)** Overlay

626 of UMAP clustering of pre-gated IgD<sup>-</sup> B cells (59000 events each per cohort of HD or  
627 SLE, respectively) and manual gated IgD<sup>-</sup>CD27<sup>-</sup> subsets. Gates of DN<sup>int</sup>, DN<sup>low</sup> and

628 DN<sup>high</sup> populations are indicated. **(E)** Comparison of UMAP density plots clustering

629 corresponding B cell subsets of HD and SLE. (MWU between selected relevant  
630 comparisons: \* $p \leq 0.05$ , \*\* $p \leq 0.01$ , \*\*\* $p \leq 0.001$ , \*\*\*\* $p \leq 0.0001$ )

631 **Figure 2: Expression patterns of surface markers differ between DN<sup>low</sup>, DN<sup>high</sup>  
632 and DN<sup>int</sup> subsets but are comparable to corresponding memory subsets. (A)**

633 Colour coded mean signal intensity of CD27, CD19, CXCR5, CD24, CD71, CD95,  
634 CD38 and CD11c presented as UMAP. Gates indicate the clustered areas of DN<sup>low</sup>

635 (left gate), DN<sup>high</sup> (middle gate) and DN<sup>int</sup> (right gate). **(B)** Representative histograms

636 of flow cytometry data of DN subsets of one healthy donor showing surface marker  
637 expression in comparison to CD19<sup>-</sup> cells (grey) and CD27<sup>++</sup>CD38<sup>++</sup> plasmablasts

638 (black line). **(C)** Box and whisker plots of median FI of CD24, CD11c, CD71 and  
639 frequencies of CD38<sup>+</sup> or CD95<sup>+</sup> of HD (n=8) for each subset of DN **(D)** and median

640 FIs of PD1 and PD-L1 in HD (n=8).(test: MWU) **(E)** Heat map showing log<sub>2</sub>(fold

641 change) of median FI of surface marker expression by mem/DN<sup>int</sup>, mem/DN<sup>low</sup> and

642 mem/DN<sup>high</sup> subsets related to main B cell populations of transitional, naïve

643 (IgD<sup>+</sup>CD27<sup>-</sup>), pre-switched (IgD<sup>+</sup>CD27<sup>+</sup>) and plasmablast (PB). Red indicating



644 markers that are higher expressed on the subsets of interest and blue indicating a  
645 lower expression of the marker on the subsets compared to the main B cell  
646 populations. **(F)** Heatmap of Spearman correlation coefficient ( $r_s$ ) and scatterplot of  
647 correlation between PBs and mem/DN<sup>int</sup>, mem/DN<sup>low</sup> and mem/DN<sup>high</sup> subset  
648 frequencies of HD (n=8) and SLE (n=10). **(G)** Box and whisker plots of median FI of  
649 CD71, CD24, CD11c and frequencies of CD38+ or CD95+ of SLE (triangles, n=10)  
650 and HD (dots, n=8) for each DN subset.(test: KWT) **(H)** Frequencies of  
651 immunoglobulin isotypes per DN and mem subset, respectively of HD (n=6).  
652 (Significance levels: \* $p \leq 0.05$ , \*\* $p \leq 0.01$ , \*\*\* $p \leq 0.001$ , \*\*\*\* $p \leq 0.0001$ )

653 **Figure 3: CXCR5<sup>+</sup>CD19<sup>low</sup> populations show an activated phenotype. (A)** CyTOF  
654 derived UMAP plots (showing 8841 events per cohort of HD and SLE) of IgD<sup>-</sup> B cells.  
655 Top row shows density plots of HD and SLE. Bottom row shows distribution of gated  
656 for DN<sup>int</sup>, DN<sup>low</sup> and DN<sup>high</sup>. **(B)** Frequencies among total CD19<sup>+</sup> B cells of mem/DN<sup>int</sup>,  
657 mem/DN<sup>low</sup> and mem/DN<sup>high</sup> of HD (dots, n=18) and patients with SLE (triangles,  
658 n=24). Expression of activation markers CD86, CD69 and CD25 by mem/DN<sup>int</sup>,  
659 mem/DN<sup>low</sup> and mem/DN<sup>high</sup> for **(C)** comparison of subsets (test: MWU) or **(D)** HD vs  
660 SLE (test: KWT). Scatter plots show the expression of immune checkpoint molecules  
661 for comparison **(E)** in between subsets or **(F)** between HD and SLE. (Data is shown  
662 as median + 95%CI of [n(HD/SLE) = 18/24]. (Significance levels: \* $p \leq 0.05$ , \*\* $p \leq$   
663 0.01, \*\*\* $p \leq 0.001$ , \*\*\*\* $p \leq 0.0001$ )

664 **Figure 4: CD19<sup>low</sup> (mem/DN<sup>low</sup>) subsets correlate with plasmablasts upon**  
665 **vaccination of healthy individuals with BNT162b2. (A)** Kinetics of B cell subset  
666 and PB frequencies of 17 HDs before and 7, 14 and 21 days after first vaccination  
667 and 7 days upon boost with BNT162b2 were analyzed using flow cytometry. (KWT:\* $p$   
668  $\leq 0.05$ , \*\* $p \leq 0.01$ , \*\*\* $p \leq 0.001$ , \*\*\*\* $p \leq 0.0001$ ) **(B)** Scatter plots show correlations  
669 between certain B cell subsets and PBs frequencies upon BNT162b2 vaccination at  
670 certain time points of HDs (n=17). (Spearman correlation:  $r =$  Spearman coefficient, \* $p$   
671  $\leq 0.05$ , \*\* $p \leq 0.01$ , \*\*\* $p \leq 0.001$ , \*\*\*\* $p \leq 0.0001$ ).

672 **Figure 5: Reduced BCR responsiveness in CD19 low subsets. (A)**  
673 Phosphorylation kinetics of Syk (Y352) of mem/DN<sup>int</sup>, mem/DN<sup>low</sup> and mem/DN<sup>high</sup>  
674 subsets and PB at time points 0, 5, 8 and 15 min in HD (n=8, solid line) and SLE  
675 (n=15, dashed line). Data is shown in means  $\pm$  standard error of mean (SEM) (test:  
676 MWU between HD as SLE for each timepoint) **(B)** Scatter plot of Syk expression of

677 mem/DN<sup>int</sup>, mem/DN<sup>low</sup> and mem/DN<sup>high</sup> subsets of HD (n=8, dots) and patients with  
678 SLE (n=15, triangle) (test: KWT).

679 **Figure 6: DN<sup>low</sup> subsets show a transcriptional expression profile somewhat**  
680 **similar to plasmablasts.** Boxplots of Log<sub>2</sub>(Counts per million(CPM)) of transcription  
681 factors *IRF4*, *PRDM1*, *PAX5*, *XBP1*, *EZH2* and *BCL2L1* depicted for naïve, pre-  
682 switched, total memory, PBs and DN subsets (DN<sup>int</sup>, DN<sup>low</sup> and DN<sup>high</sup>) of each 7  
683 donors of HD and SLE (test: KWT, \*p ≤ 0.05, \*\*p ≤ 0.01, \*\*\*p ≤ 0.001, \*\*\*\*p ≤  
684 0.0001).

685 **Supplementary Figure 1: Surface expression patterns on mem<sup>int</sup>, mem<sup>low</sup> and**  
686 **mem<sup>high</sup> detected by flow cytometry. (A)** Gating strategy of flow cytometry staining  
687 for identification of mem and DN subsets shown for a HD. **(B)** Box and whisker plots  
688 of median FI of CD71, CD24, CD11c and frequencies of CD38<sup>+</sup> or CD95<sup>+</sup> of HD  
689 (n=8) for each subset. **(C)** Box and whisker plots of median FI of PD1 and PD-L1 for  
690 each subset. **(D)** Box and whisker plots of median FI of CD71 and frequencies of  
691 CD95<sup>+</sup> and CD38<sup>+</sup> cells memory subsets for HD (dots, n=8) compared to SLE  
692 patients (triangles, n=9). (Significance levels: \*p ≤ 0.05, \*\*p ≤ 0.01, \*\*\*p ≤ 0.001, \*\*\*\*p  
693 ≤ 0.0001).

694 **Supplementary Figure 2: Activation marker and checkpoint molecule**  
695 **expression detected by mass cytometry (A)** Gating strategy of CyTOF. **(B)**  
696 Distribution of subsets within IgD<sup>-</sup>CD27<sup>+</sup> and IgD<sup>-</sup>CD27<sup>-</sup> **(C)** Scatter plots show  
697 expression of CD45RA and CD45RO for comparison in between subsets.**(D)**  
698 CD45RA and CD45RO differences between HD and patients with SLE. Scatter plots  
699 show expression of PD1 and PD-L1 for comparison in between **(E)** subsets or **(F)**  
700 between HD (dots) and SLE patients (triangles). **(G)** Scatter plots show expression of  
701 Ki-67 for comparison in between subsets or between HD (dots) and SLE patients  
702 (triangles). (Data is shown as median + 95%CI of [n(HD/SLE) = 18/24]. (Significance  
703 levels: \*p ≤ 0.05, \*\*p ≤ 0.01, \*\*\*p ≤ 0.001, \*\*\*\*p ≤ 0.0001)

704

705 **Supplementary table1: Antibodies for flow cytometry analysis**

| target     | fluorochrome                        | Clone     | Manufacturer     |
|------------|-------------------------------------|-----------|------------------|
| CD19       | Brilliant Violet (BV) 711           | SJ25C1    | Becton Dickinson |
| CD27       | BV785                               | L128      | Becton Dickinson |
| CD20       | BV510                               | 2H7       | Biolegend        |
| IgD        | Phycoerythrin(PE)/Dazzle            | IA6-2     | Biolegend        |
| CD38       | Allophycocyanin (APC)-Cyanin7 (Cy7) | HIT       | Biolegend        |
| CD3        | Brilliant Ultraviolet (BUV) 395     | M5E2      | Becton Dickinson |
| CD14       | BUV395                              | UCHT1     | Becton Dickinson |
| CD10       | BV510                               | HI10A     | Becton Dickinson |
| CD24       | BV605                               | ML5       | Becton Dickinson |
| CD11c      | BUV737                              | B-ly6     | Becton Dickinson |
| CXCR5      | BV421                               | RF8B2     | Becton Dickinson |
| CXCR5      | PE                                  | 51505     | R&D System       |
| CD95       | PE-Cy7                              | APO-1/Fas | Invitrogen       |
| CD71       | Fluorescein (FITC)                  | Okt3      | eBioscience      |
| CD27       | APC                                 | L128      | Becton Dickinson |
| CD19       | APC-H7                              | SJ25C1    | Becton Dickinson |
| CD20       | BV510                               | 2H7       | Biolegend        |
| CD38       | PerCpCy5.5                          | HIT2      | Becton Dickinson |
| CD3        | Pacific Blue (PacB)                 | UCHT1     | Becton Dickinson |
| CD14       | PacB                                | M5E2      | Becton Dickinson |
| PD1        | PE                                  | EH12.2H7  | Becton Dickinson |
| PD-L1      | APC                                 | 29E2A3    | Biolegend        |
| Syk        | FITC                                | 4D10      | Becton Dickinson |
| pSyk(Y352) | PE                                  |           | Becton Dickinson |
| CD22       | APC                                 | S-HCL-1   | Becton Dickinson |
| IgM        | BV421                               | G20-127   | Becton Dickinson |
| IgA        | Brilliant Blue (BB)515              | IS11-8E10 | Becton Dickinson |
| IgG        | PeCy7                               | G18-145   | Becton Dickinson |

707 **Supplementary table 2: Antibodies for mass cytometry analysis**

| antibody     | Isotype tag |
|--------------|-------------|
| CD45         | Y89         |
| ICOS         | Pr141       |
| CD19         | Nd142       |
| VISTA        | 908-Nd143   |
| CD69         | Nd144       |
| CD4          | Nd145       |
| IgD          | Nd146       |
| CD11c        | Sm147       |
| CD274/PD-L1  | Nd148       |
| CD25         | Sm149       |
| CD223/LAG-3  | Nd150       |
| CD123        | Eu151       |
| TCRgd        | Sm152       |
| TIGIT        | Eu153       |
| TIM3         | Sm154       |
| CD27         | Gd155       |
| CD86/B7.2    | Gd156       |
| CD137/4-1BB  | Gd158       |
| Foxp3        | Tb159       |
| CD14         | Gd160       |
| CD152/CTLA-4 | Dy161       |
| CD8          | Dy162       |
| CD272/BTLA   | Dy163       |
| CXCR5        | Dy164       |
| CD45R0       | Ho165       |
| CD155        | Er166       |
| CD38         | Er167       |
| Ki-67        | Er168       |
| CD45RA       | Tm169       |
| CD3          | Er170       |
| CD226        | Yb171       |
| IgM          | Yb172       |
| CD162/PSGL   | Yb173       |
| HLA-DR       | Yb174       |
| CD279/PD-1   | Lu175       |
| CD56         | Yb176       |
| CD16         | Bi209       |

708

709

**A**

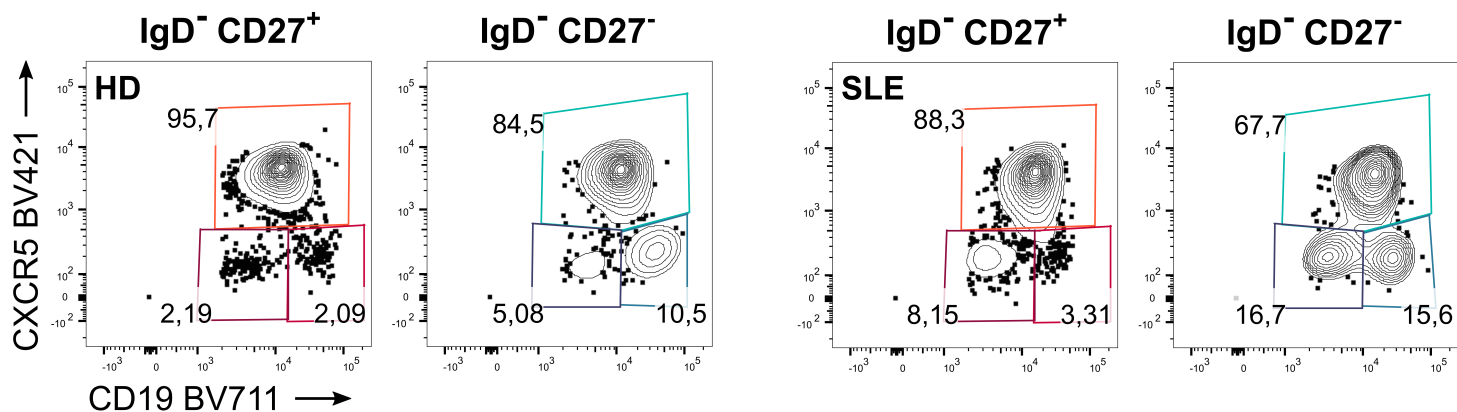

**B**

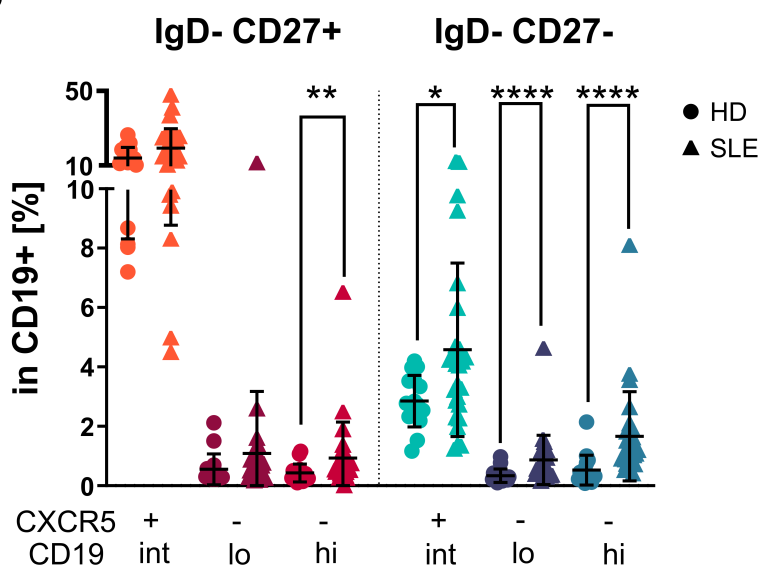

**C**

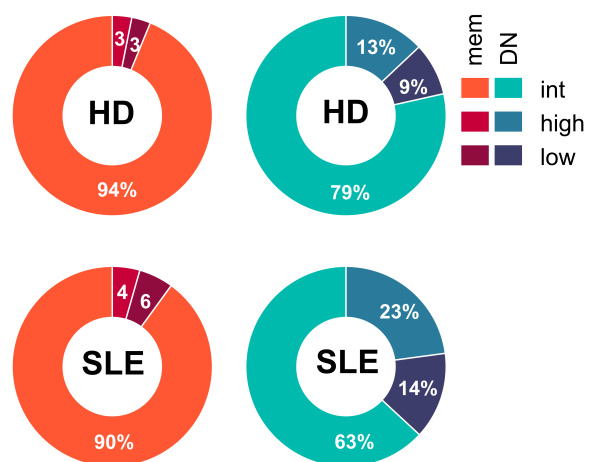

**D**

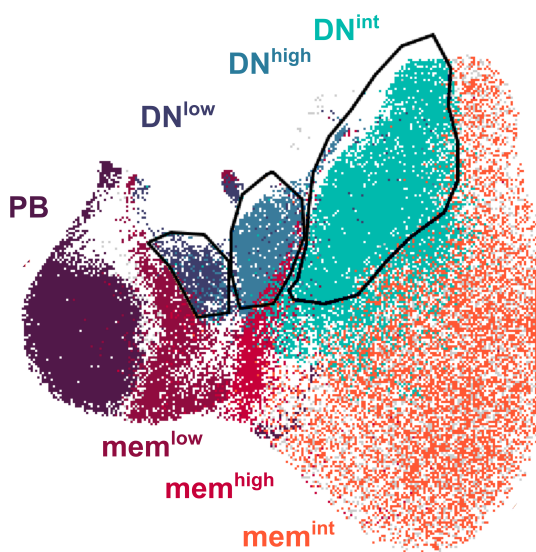

**E**

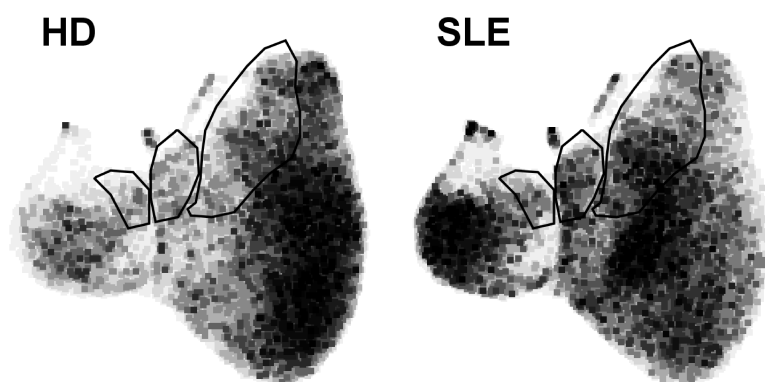

Figure 1  
Szelinski et al.

**A**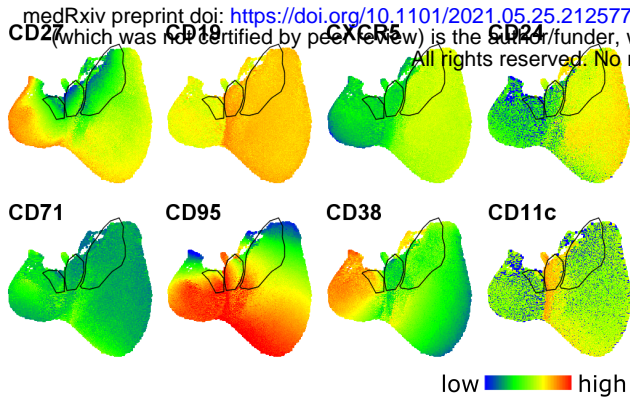**B**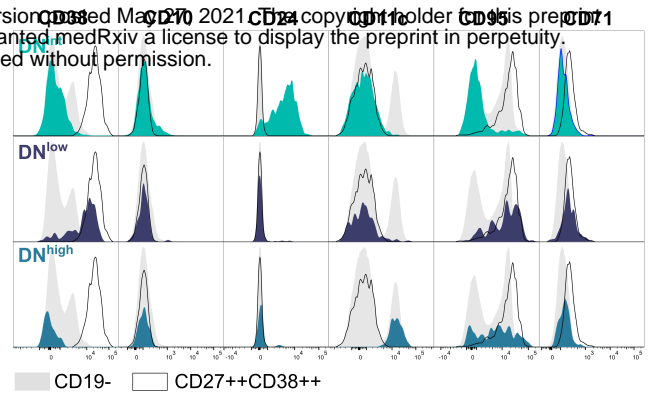**C**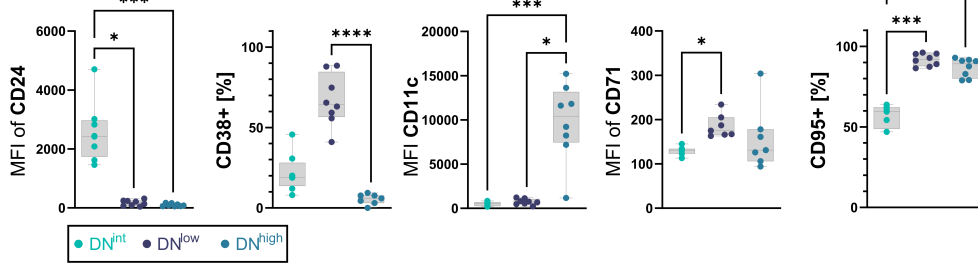**D**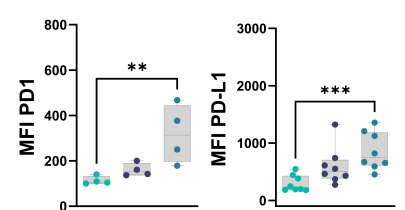**E**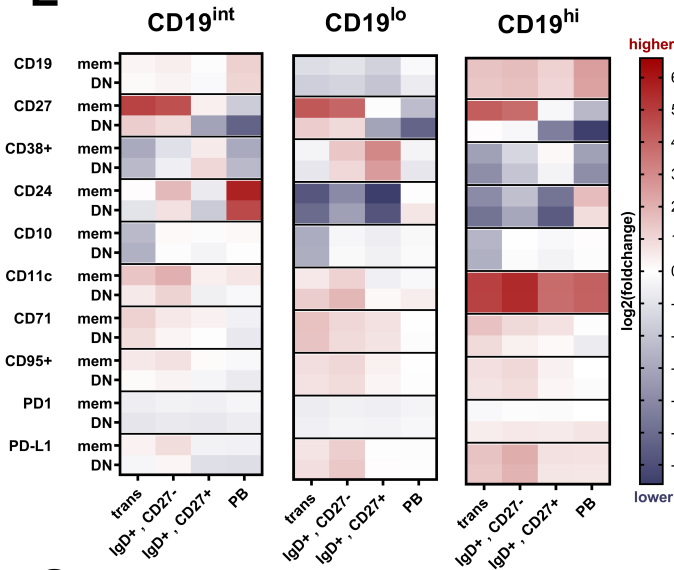**F**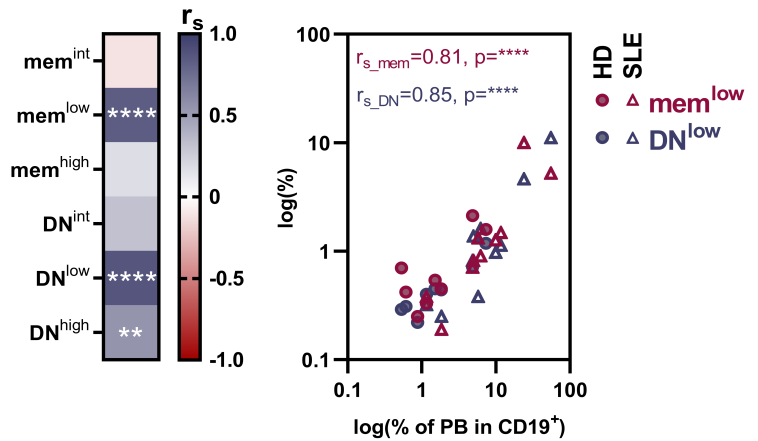**G**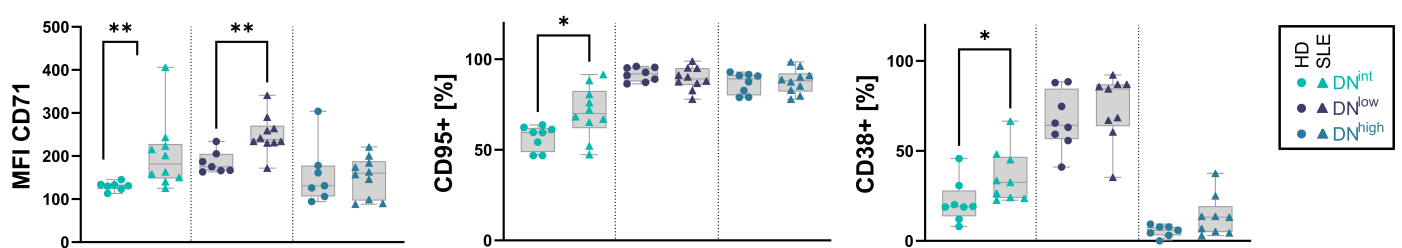**H**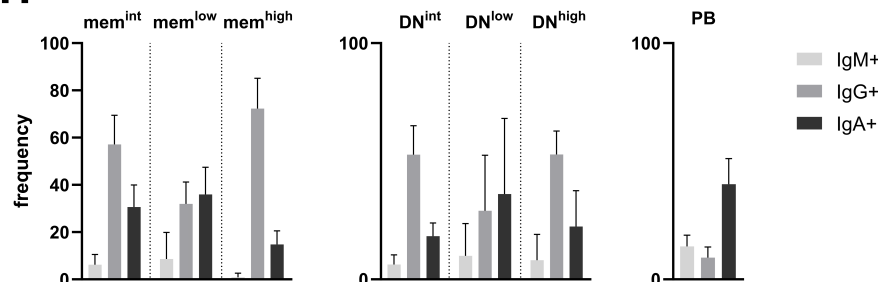

Figure 2  
Szelinski et al.

**A**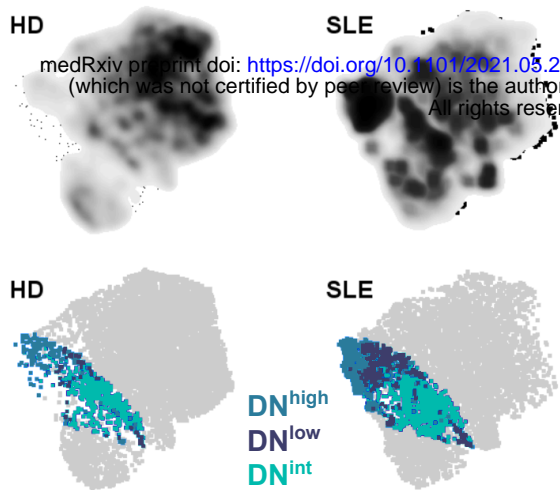**B**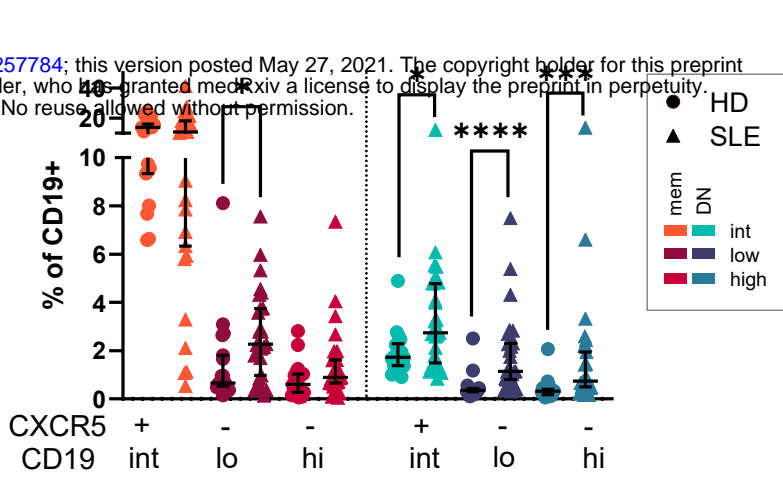**C**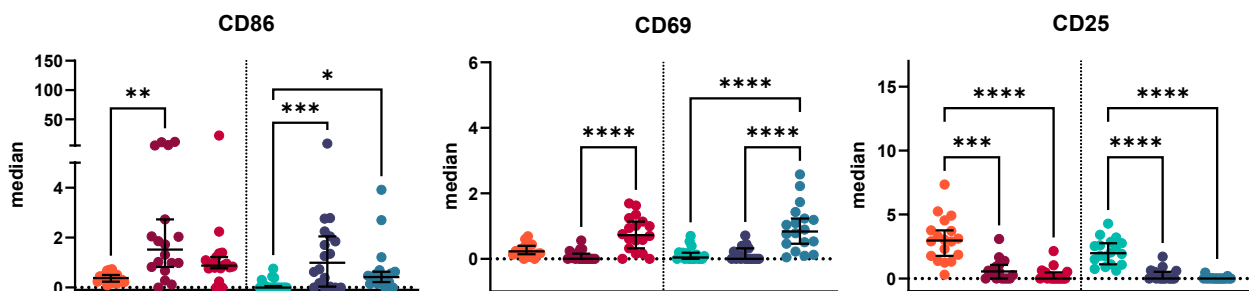**D**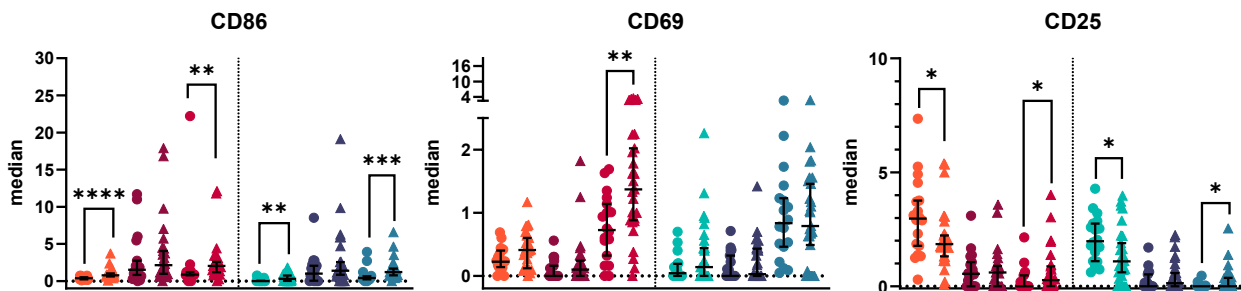**E**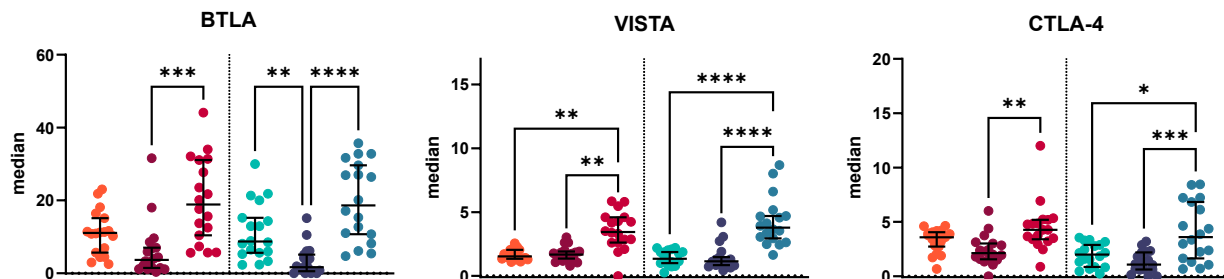**F**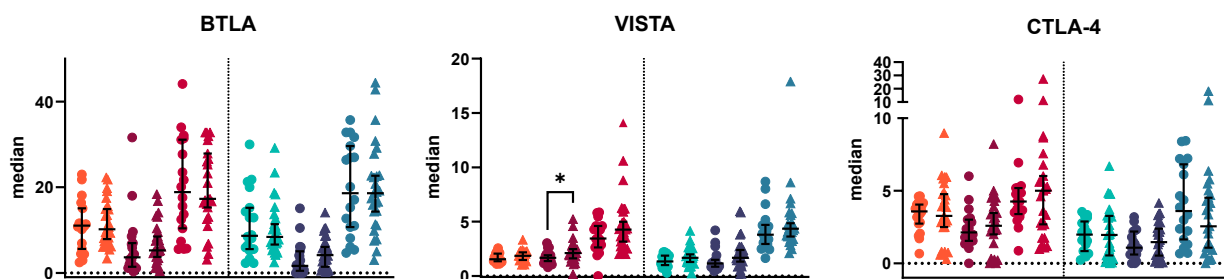

Figure 3  
Szelinski et al.



**A**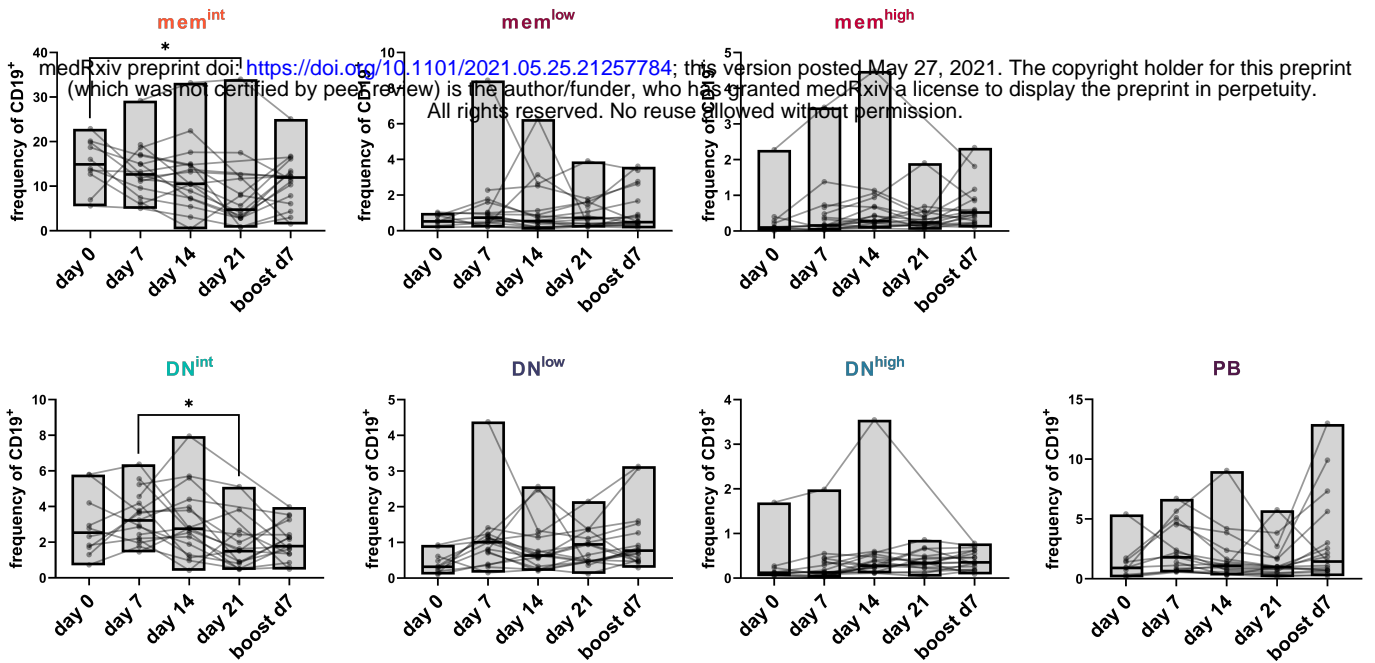**B**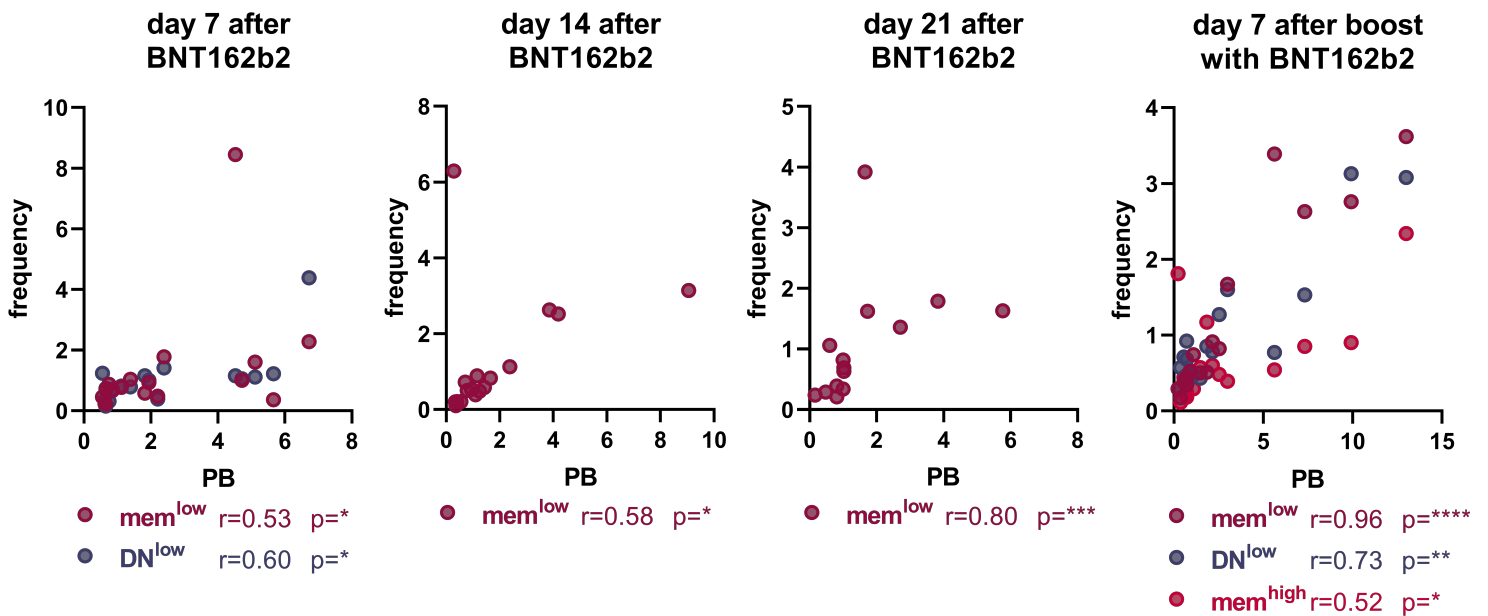

Figure 4  
Szelinski et al.



**A**

medRxiv preprint doi: <https://doi.org/10.1101/2021.05.25.21257784>; this version posted May 27, 2021. The copyright holder for this preprint (which was not certified by peer review) is the author/funder, who has granted medRxiv a license to display the preprint in perpetuity. All rights reserved. No reuse allowed without permission.

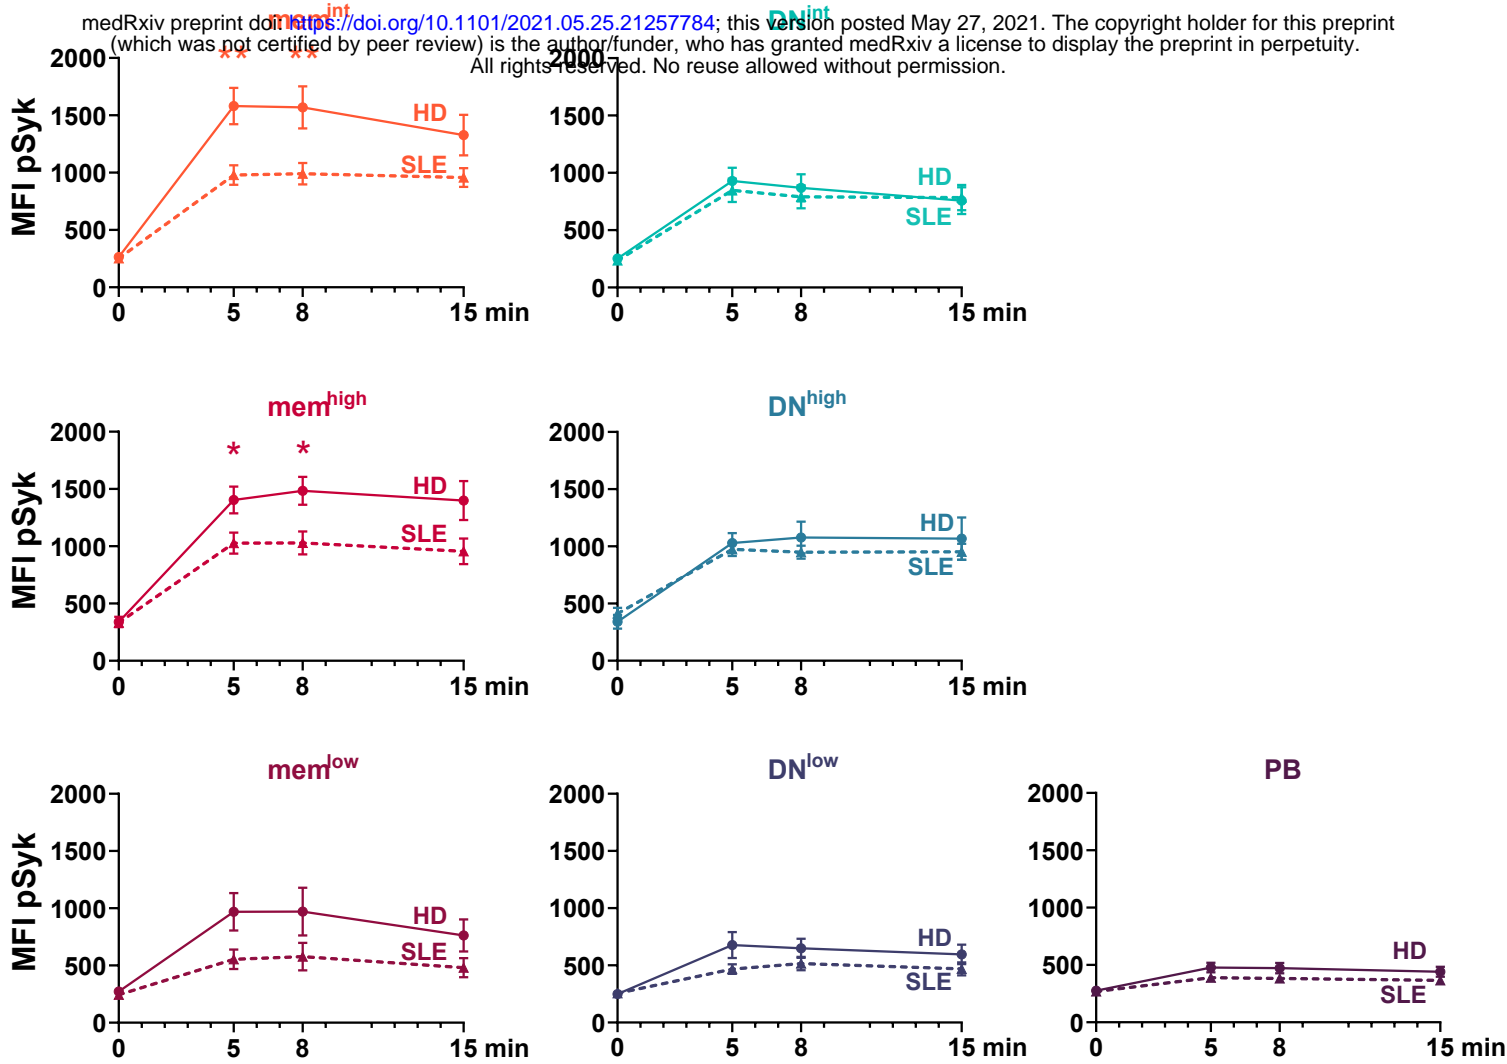**B**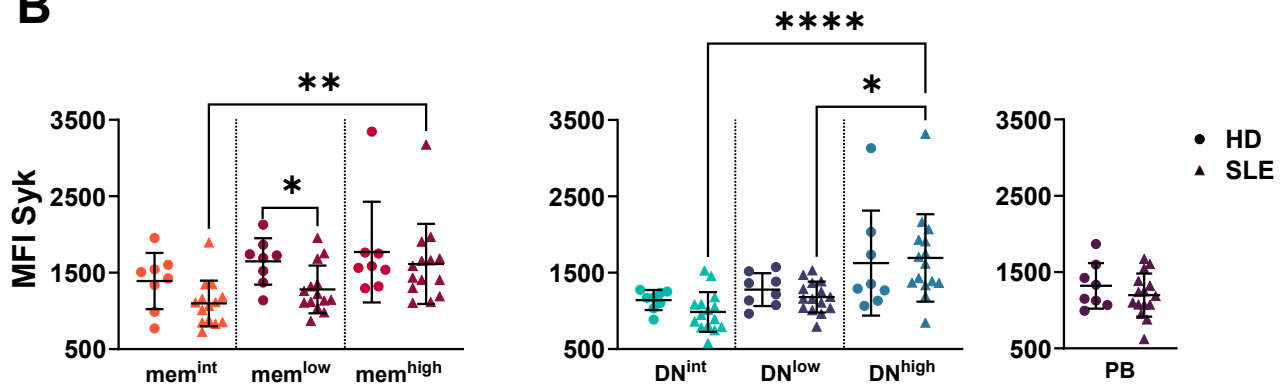

Figure 5  
Szelinski et al.

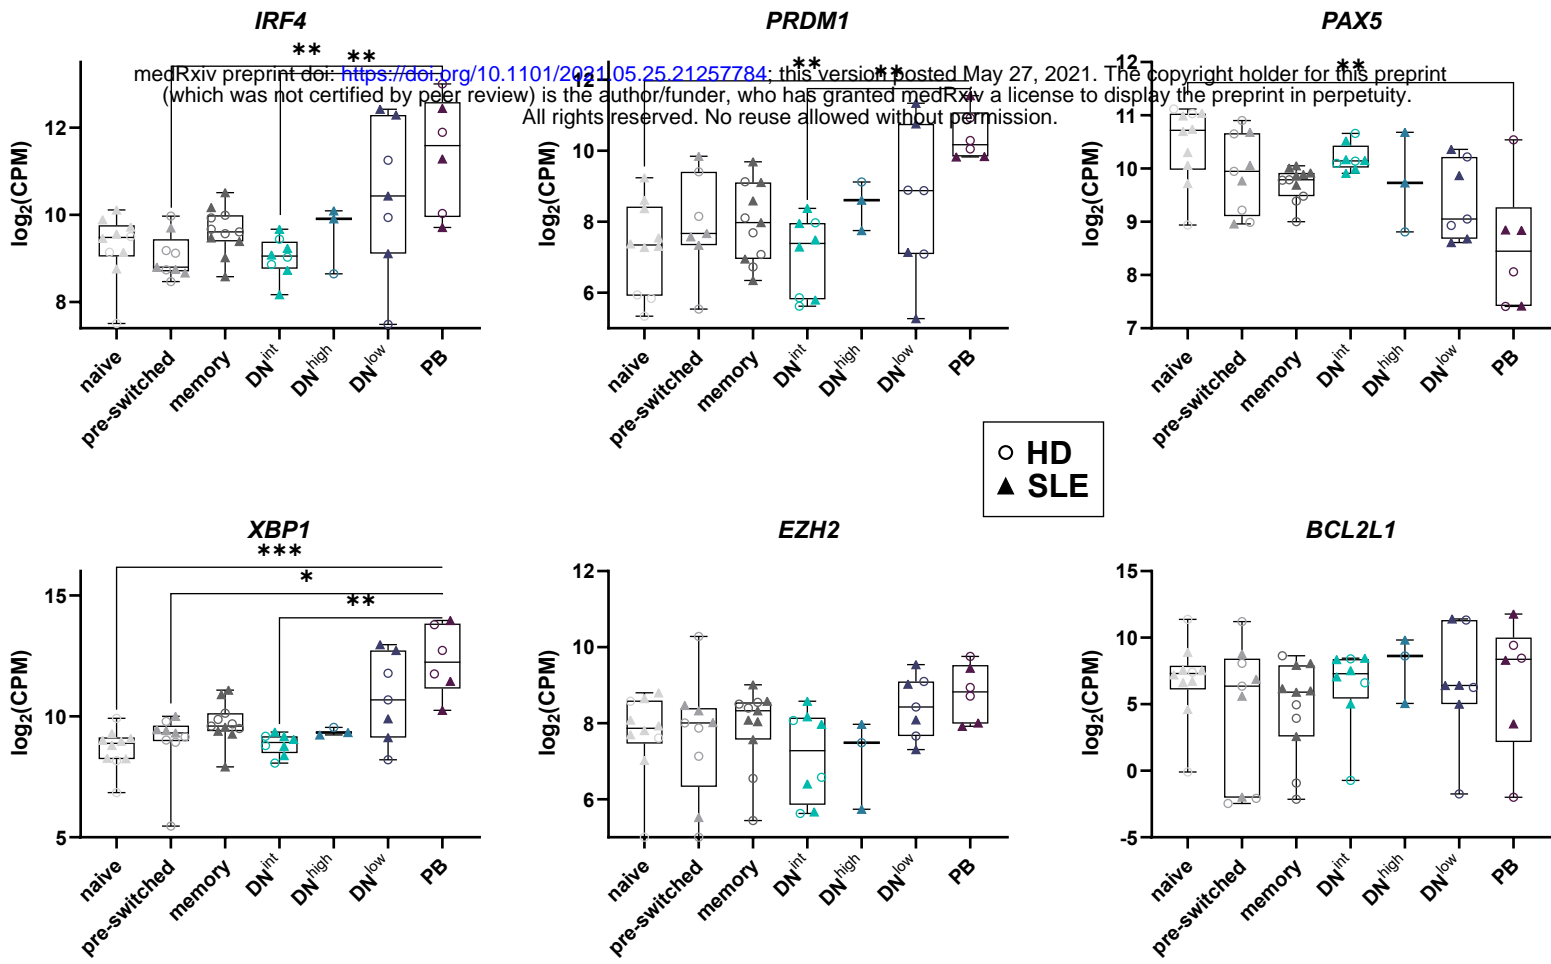

Figure 6  
Szelinski et al.
